# Supplementary material for: Effectiveness of Palliative Care before Death in Reducing Emergency Care Utilization for Patients with Terminal Cancer and Trends in the Utilization of Palliative Care from 2005–2018
Source: MDPI journal article supplement (doi:10.3390/healthcare11212907), 2023-11-06
Supplement: s1 [file s1]

**Supplementary Table S1. Characteristics of patients with terminal cancer**

| Variable                        | N      | %      | PC not enrolled |       | PC enrolled |       | $\chi^2$ |
|---------------------------------|--------|--------|-----------------|-------|-------------|-------|----------|
|                                 |        |        | n               | %     | n           | %     | p-value  |
| Total                           | 605126 | 100.00 | 365417          | 60.39 | 239709      | 39.61 |          |
| Gender                          |        |        |                 |       |             |       | <0.001   |
| Male                            | 380319 | 62.85  | 238437          | 62.69 | 141882      | 37.31 |          |
| Female                          | 224807 | 37.15  | 126980          | 56.48 | 97827       | 43.52 |          |
| Age                             |        |        |                 |       |             |       | <0.001   |
| <55 years                       | 111438 | 18.42  | 65626           | 58.89 | 45812       | 41.11 |          |
| 55-64 years                     | 122092 | 20.18  | 69102           | 56.60 | 52990       | 43.40 |          |
| 65-74 years                     | 138623 | 22.91  | 83964           | 60.57 | 54659       | 39.43 |          |
| 75-84 years                     | 157967 | 26.10  | 99718           | 63.13 | 58249       | 36.87 |          |
| $\geq 85$ years                 | 75006  | 12.40  | 47007           | 62.67 | 27999       | 37.33 |          |
| Education level                 |        |        |                 |       |             |       | <0.001   |
| Illiteracy or elementary school | 328769 | 54.33  | 209145          | 63.61 | 119624      | 36.39 |          |
| Junior high school              | 113541 | 18.76  | 65461           | 57.65 | 48080       | 42.35 |          |
| Senior high school              | 124607 | 20.59  | 69630           | 55.88 | 54977       | 44.12 |          |
| University or above             | 38209  | 6.31   | 21181           | 55.43 | 17028       | 44.57 |          |
| Marital status                  |        |        |                 |       |             |       | <0.001   |
| Unmarried                       | 43235  | 7.14   | 25138           | 58.14 | 18097       | 41.86 |          |
| Married                         | 385515 | 63.71  | 234782          | 60.90 | 150733      | 39.10 |          |
| Divorced and Widowed            | 176376 | 29.15  | 105497          | 59.81 | 70879       | 40.19 |          |

**Supplementary Table S1. Characteristics of patients with terminal cancer (cont.)**

| Variable                              | N      | %     | PC not enrolled |       | PC enrolled |       | $\chi^2$ |
|---------------------------------------|--------|-------|-----------------|-------|-------------|-------|----------|
|                                       |        |       | n               | %     | n           | %     | p-value  |
| Monthly salary                        |        |       |                 |       |             |       | <0.001   |
| $\leq 17,280$                         | 187919 | 31.05 | 112806          | 60.03 | 75113       | 39.97 |          |
| 17,281-22,800                         | 232626 | 38.44 | 147782          | 63.53 | 84844       | 36.47 |          |
| 22,801-28,800                         | 49294  | 8.15  | 26471           | 53.70 | 22823       | 46.30 |          |
| 28,801-36,300                         | 39310  | 6.50  | 22832           | 58.08 | 16478       | 41.92 |          |
| 36,301-45,800                         | 45272  | 7.48  | 26004           | 57.44 | 19268       | 42.56 |          |
| 45,801-57,800                         | 18389  | 3.04  | 10713           | 58.26 | 7676        | 41.74 |          |
| $\geq 57,801$                         | 32316  | 5.34  | 18809           | 58.20 | 13507       | 41.80 |          |
| Urbanization degree of residence area |        |       |                 |       |             |       | <0.001   |
| Level 1                               | 150306 | 24.84 | 88650           | 58.98 | 61656       | 41.02 |          |
| Level 2                               | 175104 | 28.94 | 102560          | 58.57 | 72544       | 41.43 |          |
| Level 3                               | 99203  | 16.39 | 59889           | 60.37 | 39314       | 39.63 |          |
| Level 4                               | 98648  | 16.30 | 62438           | 63.29 | 36210       | 36.71 |          |
| Level 5                               | 19430  | 3.21  | 12446           | 64.06 | 6984        | 35.94 |          |
| Level 6                               | 32750  | 5.41  | 20230           | 61.77 | 12520       | 38.23 |          |
| Level 7                               | 29685  | 4.91  | 19204           | 64.69 | 10481       | 35.31 |          |
| CCI                                   |        |       |                 |       |             |       | <0.001   |
| 0 point                               | 158925 | 26.26 | 91574           | 57.62 | 67351       | 42.38 |          |
| 1 point                               | 162152 | 26.80 | 96607           | 59.58 | 65545       | 40.42 |          |
| 2 points                              | 108298 | 17.90 | 65763           | 60.72 | 42535       | 39.28 |          |
| 3 points                              | 80068  | 13.23 | 50007           | 62.46 | 30061       | 37.54 |          |
| >3 points                             | 95683  | 15.81 | 61466           | 64.24 | 34217       | 35.76 |          |

**Supplementary Table S1. Characteristics of patients with terminal cancer (cont.)**

| Variable                         | N      | %     | PC not enrolled |       | PC enrolled |       | $\chi^2$ |
|----------------------------------|--------|-------|-----------------|-------|-------------|-------|----------|
|                                  |        |       | n               | %     | n           | %     | p-value  |
| Cancer type                      |        |       |                 |       |             |       | <0.001   |
| Lung                             | 100230 | 16.56 | 61635           | 61.49 | 38595       | 38.51 |          |
| Liver                            | 100370 | 16.59 | 64262           | 64.03 | 36108       | 35.97 |          |
| Colorectal                       | 66508  | 10.99 | 39817           | 59.87 | 26691       | 40.13 |          |
| Breast                           | 25048  | 4.14  | 13545           | 54.08 | 11503       | 45.92 |          |
| Oral                             | 33823  | 5.59  | 19589           | 57.92 | 14234       | 42.08 |          |
| Prostate                         | 15536  | 2.57  | 10197           | 65.63 | 5339        | 34.37 |          |
| Stomach                          | 29437  | 4.86  | 17932           | 60.92 | 11505       | 39.08 |          |
| Pancreatic                       | 18772  | 3.10  | 9404            | 50.10 | 9368        | 49.90 |          |
| Esophageal                       | 18600  | 3.07  | 11708           | 62.95 | 6892        | 37.05 |          |
| Cervical                         | 8482   | 1.40  | 5048            | 59.51 | 3434        | 40.49 |          |
| Other                            | 77027  | 12.73 | 48507           | 62.97 | 28520       | 37.03 |          |
| Multiple cancers                 | 111293 | 18.39 | 63773           | 57.30 | 47520       | 42.70 |          |
| Ownership of medical institution |        |       |                 |       |             |       | <0.001   |
| Public                           | 192654 | 31.84 | 110277          | 57.24 | 82377       | 42.76 |          |
| Non-public                       | 412472 | 68.16 | 255140          | 61.86 | 157332      | 38.14 |          |
| Level of medial institution      |        |       |                 |       |             |       | <0.001   |
| Medical center                   | 296872 | 49.06 | 174174          | 58.67 | 122698      | 41.33 |          |
| Regional hospital                | 232295 | 38.39 | 136389          | 58.71 | 95906       | 41.29 |          |
| Local hospital                   | 41438  | 6.85  | 30084           | 72.60 | 11354       | 27.40 |          |
| Primary clinic                   | 34521  | 5.70  | 24770           | 71.75 | 9751        | 28.25 |          |

PC: palliative care CCI: Charlson Comorbidity index

**Supplementary Table S2.** Comparison of patients with terminal cancer enrolled in palliative care 1 week before death and those not enrolled (before and after PSM)

| Variable    | Before matching |        |                |       |                |       |                     | After 1:1 matching |        |                |       |                |       |                     |
|-------------|-----------------|--------|----------------|-------|----------------|-------|---------------------|--------------------|--------|----------------|-------|----------------|-------|---------------------|
|             | N               | %      | No             |       | Received       |       | $\chi^2$<br>p-value | N                  | %      | No             |       | Received       |       | $\chi^2$<br>p-value |
|             |                 |        | n <sub>0</sub> | %     | n <sub>1</sub> | %     |                     |                    |        | n <sub>0</sub> | %     | n <sub>1</sub> | %     |                     |
| Total       | 570082          | 100.00 | 365417         | 64.10 | 204665         | 35.90 |                     | 336624             | 100.00 | 168312         | 50.00 | 168312         | 50.00 |                     |
| Sex         |                 |        |                |       |                |       | <0.001              |                    |        |                |       |                |       | 0.794               |
| Male        | 358764          | 62.93  | 238437         | 65.25 | 120327         | 58.79 |                     | 206269             | 61.28  | 103097         | 61.25 | 103172         | 61.30 |                     |
| Female      | 211318          | 37.07  | 126980         | 34.75 | 84338          | 41.21 |                     | 130355             | 38.72  | 65215          | 38.75 | 65140          | 38.70 |                     |
| Age         |                 |        |                |       |                |       | <0.001              |                    |        |                |       |                |       | 0.924               |
| < 55 years  | 105323          | 18.48  | 65626          | 17.96 | 39697          | 19.40 |                     | 59423              | 17.65  | 29649          | 17.62 | 29774          | 17.69 |                     |
| 55-64 years | 114856          | 20.15  | 69102          | 18.91 | 45754          | 22.36 |                     | 69173              | 20.55  | 34562          | 20.53 | 34611          | 20.56 |                     |
| 65-74 years | 130358          | 22.87  | 83964          | 22.98 | 46394          | 22.67 |                     | 75897              | 22.55  | 37952          | 22.55 | 37945          | 22.54 |                     |
| 75-84 years | 148748          | 26.09  | 99718          | 27.29 | 49030          | 23.96 |                     | 87965              | 26.13  | 43984          | 26.13 | 43981          | 26.13 |                     |
| ≥85 years   | 70797           | 12.42  | 47007          | 12.86 | 23790          | 11.62 |                     | 44166              | 13.12  | 22165          | 13.17 | 22001          | 13.07 |                     |
| CCI         |                 |        |                |       |                |       | <0.001              |                    |        |                |       |                |       | 0.995               |
| 0 point     | 149599          | 26.24  | 91574          | 25.06 | 58025          | 28.35 |                     | 90702              | 26.94  | 45334          | 26.93 | 45368          | 26.95 |                     |
| 1 point     | 152672          | 26.78  | 96607          | 26.44 | 56065          | 27.39 |                     | 90774              | 26.97  | 45360          | 26.95 | 45414          | 26.98 |                     |
| 2 points    | 102306          | 17.95  | 65763          | 18.00 | 36543          | 17.86 |                     | 61126              | 18.16  | 30610          | 18.19 | 30516          | 18.13 |                     |
| 3 points    | 75183           | 13.19  | 50007          | 13.68 | 25176          | 12.30 |                     | 43286              | 12.86  | 21633          | 12.85 | 21653          | 12.86 |                     |
| >3 points   | 90322           | 15.84  | 61466          | 16.82 | 28856          | 14.10 |                     | 50736              | 15.07  | 25375          | 15.08 | 25361          | 15.07 |                     |
| Cancer type |                 |        |                |       |                |       | <0.001              |                    |        |                |       |                |       | 1.000               |
| Lung        | 94526           | 16.58  | 61635          | 16.87 | 32891          | 16.07 |                     | 54991              | 16.34  | 27484          | 16.33 | 27507          | 16.34 |                     |
| Liver       | 93234           | 16.35  | 64262          | 17.59 | 28972          | 14.16 |                     | 50546              | 15.02  | 25248          | 15.00 | 25298          | 15.03 |                     |
| Colorectal  | 62721           | 11.00  | 39817          | 10.90 | 22904          | 11.19 |                     | 38016              | 11.29  | 19070          | 11.33 | 18946          | 11.26 |                     |
| Breast      | 23271           | 4.08   | 13545          | 3.71  | 9726           | 4.75  |                     | 14352              | 4.26   | 7184           | 4.27  | 7168           | 4.26  |                     |

|                  |        |       |       |       |       |       |       |       |       |       |       |       |
|------------------|--------|-------|-------|-------|-------|-------|-------|-------|-------|-------|-------|-------|
| Oral             | 32256  | 5.66  | 19589 | 5.36  | 12667 | 6.19  | 20251 | 6.02  | 10132 | 6.02  | 10119 | 6.01  |
| Prostate         | 14774  | 2.59  | 10197 | 2.79  | 4577  | 2.24  | 8678  | 2.58  | 4360  | 2.59  | 4318  | 2.57  |
| Stomach          | 27798  | 4.88  | 17932 | 4.91  | 9866  | 4.82  | 15911 | 4.73  | 7910  | 4.70  | 8001  | 4.75  |
| Pancreatic       | 17369  | 3.05  | 9404  | 2.57  | 7965  | 3.89  | 10489 | 3.12  | 5252  | 3.12  | 5237  | 3.11  |
| Esophageal       | 17700  | 3.10  | 11708 | 3.20  | 5992  | 2.93  | 9811  | 2.91  | 4914  | 2.92  | 4897  | 2.91  |
| Cervical         | 8078   | 1.42  | 5048  | 1.38  | 3030  | 1.48  | 4581  | 1.36  | 2300  | 1.37  | 2281  | 1.36  |
| Other            | 73248  | 12.85 | 48507 | 13.27 | 24741 | 12.09 | 41663 | 12.38 | 20811 | 12.36 | 20852 | 12.39 |
| Multiple cancers | 105107 | 18.44 | 63773 | 17.45 | 41334 | 20.20 | 67335 | 20.00 | 33647 | 19.99 | 33688 | 20.02 |

---

PSM, propensity score matching

CCI, Charlson Comorbidity Index

**Supplementary Table S3.** Comparison of patients with terminal cancer enrolled in palliative care 4 week before death and those not enrolled (before and after PSM)

| Variable    | Before matching |        |                |       |                |       |                     | After 1:1 matching |        |                |       |                |       |                     |
|-------------|-----------------|--------|----------------|-------|----------------|-------|---------------------|--------------------|--------|----------------|-------|----------------|-------|---------------------|
|             | N               | %      | No             |       | Received       |       | $\chi^2$<br>p-value | N                  | %      | No             |       | Received       |       | $\chi^2$<br>p-value |
|             |                 |        | n <sub>0</sub> | %     | n <sub>1</sub> | %     |                     |                    |        | n <sub>0</sub> | %     | n <sub>1</sub> | %     |                     |
| Total       | 480212          | 100.00 | 365417         | 76.09 | 114795         | 23.91 |                     | 217080             | 100.00 | 108540         | 50.00 | 108540         | 50.00 |                     |
| Sex         |                 |        |                |       |                |       | <0.001              |                    |        |                |       |                |       | 0.724               |
| Male        | 304056          | 63.32  | 238437         | 65.25 | 65619          | 57.16 |                     | 127692             | 58.82  | 63805          | 58.78 | 63887          | 58.86 |                     |
| Female      | 176156          | 36.68  | 126980         | 34.75 | 49176          | 42.84 |                     | 89388              | 41.18  | 44735          | 41.22 | 44653          | 41.14 |                     |
| Age         |                 |        |                |       |                |       | <0.001              |                    |        |                |       |                |       | 0.952               |
| < 55 years  | 88959           | 18.52  | 65626          | 17.96 | 23333          | 20.33 |                     | 41485              | 19.11  | 20690          | 19.06 | 20795          | 19.16 |                     |
| 55-64 years | 94922           | 19.77  | 69102          | 18.91 | 25820          | 22.49 |                     | 47371              | 21.82  | 23677          | 21.81 | 23694          | 21.83 |                     |
| 65-74 years | 109290          | 22.76  | 83964          | 22.98 | 25326          | 22.06 |                     | 48489              | 22.34  | 24243          | 22.34 | 24246          | 22.34 |                     |
| 75-84 years | 126573          | 26.36  | 99718          | 27.29 | 26855          | 23.39 |                     | 53016              | 24.42  | 26518          | 24.43 | 26498          | 24.41 |                     |
| ≥85 years   | 60468           | 12.59  | 47007          | 12.86 | 13461          | 11.73 |                     | 26719              | 12.31  | 13412          | 12.36 | 13307          | 12.26 |                     |
| CCI         |                 |        |                |       |                |       | <0.001              |                    |        |                |       |                |       | 1.000               |
| 0 point     | 125062          | 26.04  | 91574          | 25.06 | 33488          | 29.17 |                     | 61877              | 28.50  | 30917          | 28.48 | 30960          | 28.52 |                     |
| 1 point     | 128342          | 26.73  | 96607          | 26.44 | 31735          | 27.64 |                     | 59616              | 27.46  | 29828          | 27.48 | 29788          | 27.44 |                     |
| 2 points    | 86443           | 18.00  | 65763          | 18.00 | 20680          | 18.01 |                     | 39393              | 18.15  | 19696          | 18.15 | 19697          | 18.15 |                     |
| 3 points    | 63546           | 13.23  | 50007          | 13.68 | 13539          | 11.79 |                     | 26158              | 12.05  | 13077          | 12.05 | 13081          | 12.05 |                     |
| >3 points   | 76819           | 16.00  | 61466          | 16.82 | 15353          | 13.37 |                     | 30036              | 13.84  | 15022          | 13.84 | 15014          | 13.83 |                     |
| Cancer type |                 |        |                |       |                |       | <0.001              |                    |        |                |       |                |       | 1.000               |
| Lung        | 80258           | 16.71  | 61635          | 16.87 | 18623          | 16.22 |                     | 35708              | 16.45  | 17832          | 16.43 | 17876          | 16.47 |                     |
| Liver       | 77214           | 16.08  | 64262          | 17.59 | 12952          | 11.28 |                     | 25730              | 11.85  | 12867          | 11.85 | 12863          | 11.85 |                     |
| Colorectal  | 53093           | 11.06  | 39817          | 10.90 | 13276          | 11.56 |                     | 24829              | 11.44  | 12413          | 11.44 | 12416          | 11.44 |                     |
| Breast      | 19235           | 4.01   | 13545          | 3.71  | 5690           | 4.96  |                     | 10145              | 4.67   | 5085           | 4.68  | 5060           | 4.66  |                     |

|                  |       |       |       |       |       |       |       |       |       |       |       |       |
|------------------|-------|-------|-------|-------|-------|-------|-------|-------|-------|-------|-------|-------|
| Oral             | 27783 | 5.79  | 19589 | 5.36  | 8194  | 7.14  | 15123 | 6.97  | 7565  | 6.97  | 7558  | 6.96  |
| Prostate         | 13024 | 2.71  | 10197 | 2.79  | 2827  | 2.46  | 5528  | 2.55  | 2765  | 2.55  | 2763  | 2.55  |
| Stomach          | 23287 | 4.85  | 17932 | 4.91  | 5355  | 4.66  | 9831  | 4.53  | 4903  | 4.52  | 4928  | 4.54  |
| Pancreatic       | 13504 | 2.81  | 9404  | 2.57  | 4100  | 3.57  | 6941  | 3.20  | 3460  | 3.19  | 3481  | 3.21  |
| Esophageal       | 15143 | 3.15  | 11708 | 3.20  | 3435  | 2.99  | 6521  | 3.00  | 3256  | 3.00  | 3265  | 3.01  |
| Cervical         | 6922  | 1.44  | 5048  | 1.38  | 1874  | 1.63  | 3205  | 1.48  | 1612  | 1.49  | 1593  | 1.47  |
| Other            | 63103 | 13.14 | 48507 | 13.27 | 14596 | 12.71 | 27653 | 12.74 | 13831 | 12.74 | 13822 | 12.73 |
| Multiple cancers | 87646 | 18.25 | 63773 | 17.45 | 23873 | 20.80 | 45866 | 21.13 | 22951 | 21.15 | 22915 | 21.11 |

---

PSM, propensity score matching

CCI, Charlson Comorbidity Index

**Supplementary Table S4.** Comparison of patients with terminal cancer enrolled in palliative care 8 week before death and those not enrolled (before and after PSM)

| Variable    | Before matching |        |                |       |                |       |                     | After 1:1 matching |        |                |       |                |       |                     |
|-------------|-----------------|--------|----------------|-------|----------------|-------|---------------------|--------------------|--------|----------------|-------|----------------|-------|---------------------|
|             | N               | %      | No             |       | Received       |       | $\chi^2$<br>p-value | N                  | %      | No             |       | Received       |       | $\chi^2$<br>p-value |
|             |                 |        | n <sub>0</sub> | %     | n <sub>1</sub> | %     |                     |                    |        | n <sub>0</sub> | %     | n <sub>1</sub> | %     |                     |
| Total       | 427710          | 100.00 | 365417         | 85.44 | 62293          | 14.56 |                     | 123500             | 100.00 | 61750          | 50.00 | 61750          | 50.00 |                     |
| Sex         |                 |        |                |       |                |       | <0.001              |                    |        |                |       |                |       | 0.986               |
| Male        | 273000          | 63.83  | 238437         | 65.25 | 34563          | 55.48 |                     | 68962              | 55.84  | 34483          | 55.84 | 34479          | 55.84 |                     |
| Female      | 154710          | 36.17  | 126980         | 34.75 | 27730          | 44.52 |                     | 54538              | 44.16  | 27267          | 44.16 | 27271          | 44.16 |                     |
| Age         |                 |        |                |       |                |       | <0.001              |                    |        |                |       |                |       | 1.000               |
| < 55 years  | 78331           | 18.31  | 65626          | 17.96 | 12705          | 20.40 |                     | 24810              | 20.09  | 12393          | 20.07 | 12417          | 20.11 |                     |
| 55-64 years | 82960           | 19.40  | 69102          | 18.91 | 13858          | 22.25 |                     | 27413              | 22.20  | 13717          | 22.21 | 13696          | 22.18 |                     |
| 65-74 years | 97369           | 22.77  | 83964          | 22.98 | 13405          | 21.52 |                     | 26696              | 21.62  | 13344          | 21.61 | 13352          | 21.62 |                     |
| 75-84 years | 114232          | 26.71  | 99718          | 27.29 | 14514          | 23.30 |                     | 29001              | 23.48  | 14505          | 23.49 | 14496          | 23.48 |                     |
| ≥85 years   | 54818           | 12.82  | 47007          | 12.86 | 7811           | 12.54 |                     | 15580              | 12.62  | 7791           | 12.62 | 7789           | 12.61 |                     |
| CCI         |                 |        |                |       |                |       | <0.001              |                    |        |                |       |                |       | 1.000               |
| 0 point     | 109595          | 25.62  | 91574          | 25.06 | 18021          | 28.93 |                     | 35805              | 28.99  | 17895          | 28.98 | 17910          | 29.00 |                     |
| 1 point     | 113649          | 26.57  | 96607          | 26.44 | 17042          | 27.36 |                     | 33709              | 27.29  | 16854          | 27.29 | 16855          | 27.30 |                     |
| 2 points    | 77274           | 18.07  | 65763          | 18.00 | 11511          | 18.48 |                     | 22750              | 18.42  | 11366          | 18.41 | 11384          | 18.44 |                     |
| 3 points    | 57320           | 13.40  | 50007          | 13.68 | 7313           | 11.74 |                     | 14506              | 11.75  | 7262           | 11.76 | 7244           | 11.73 |                     |
| >3 points   | 69872           | 16.34  | 61466          | 16.82 | 8406           | 13.49 |                     | 16730              | 13.55  | 8373           | 13.56 | 8357           | 13.53 |                     |
| Cancer type |                 |        |                |       |                |       | <0.001              |                    |        |                |       |                |       | 1.000               |
| Lung        | 71860           | 16.80  | 61635          | 16.87 | 10225          | 16.41 |                     | 20353              | 16.48  | 10176          | 16.48 | 10177          | 16.48 |                     |
| Liver       | 70240           | 16.42  | 64262          | 17.59 | 5978           | 9.60  |                     | 11949              | 9.68   | 5976           | 9.68  | 5973           | 9.67  |                     |
| Colorectal  | 47225           | 11.04  | 39817          | 10.90 | 7408           | 11.89 |                     | 14630              | 11.85  | 7307           | 11.83 | 7323           | 11.86 |                     |
| Breast      | 17046           | 3.99   | 13545          | 3.71  | 3501           | 5.62  |                     | 6917               | 5.60   | 3457           | 5.60  | 3460           | 5.60  |                     |



|                  |       |       |       |       |       |       |       |       |       |       |       |       |
|------------------|-------|-------|-------|-------|-------|-------|-------|-------|-------|-------|-------|-------|
| Oral             | 24270 | 5.67  | 19589 | 5.36  | 4681  | 7.51  | 9276  | 7.51  | 4642  | 7.52  | 4634  | 7.50  |
| Prostate         | 11997 | 2.80  | 10197 | 2.79  | 1800  | 2.89  | 3571  | 2.89  | 1785  | 2.89  | 1786  | 2.89  |
| Stomach          | 20574 | 4.81  | 17932 | 4.91  | 2642  | 4.24  | 5139  | 4.16  | 2570  | 4.16  | 2569  | 4.16  |
| Pancreatic       | 11216 | 2.62  | 9404  | 2.57  | 1812  | 2.91  | 3499  | 2.83  | 1752  | 2.84  | 1747  | 2.83  |
| Esophageal       | 13442 | 3.14  | 11708 | 3.20  | 1734  | 2.78  | 3396  | 2.75  | 1692  | 2.74  | 1704  | 2.76  |
| Cervical         | 6146  | 1.44  | 5048  | 1.38  | 1098  | 1.76  | 2066  | 1.67  | 1025  | 1.66  | 1041  | 1.69  |
| Other            | 56704 | 13.26 | 48507 | 13.27 | 8197  | 13.16 | 16268 | 13.17 | 8140  | 13.18 | 8128  | 13.16 |
| Multiple cancers | 76990 | 18.00 | 63773 | 17.45 | 13217 | 21.22 | 26436 | 21.41 | 13228 | 21.42 | 13208 | 21.39 |

---

PSM, propensity score matching

CCI, Charlson Comorbidity Index

**Supplementary Table S5.** Comparison of patients with terminal cancer enrolled in palliative care 12 week before death and those not enrolled (before and after PSM)

| Variable    | Before matching |        |                |       |                |       |                     | After 1:1 matching |        |                |       |                |       |                     |
|-------------|-----------------|--------|----------------|-------|----------------|-------|---------------------|--------------------|--------|----------------|-------|----------------|-------|---------------------|
|             | N               | %      | No             |       | Received       |       | $\chi^2$<br>p-value | N                  | %      | No             |       | Received       |       | $\chi^2$<br>p-value |
|             |                 |        | n <sub>0</sub> | %     | n <sub>1</sub> | %     |                     |                    |        | n <sub>0</sub> | %     | n <sub>1</sub> | %     |                     |
| Total       | 405838          | 100.00 | 365417         | 90.04 | 40421          | 9.96  |                     | 80618              | 100.00 | 40309          | 50.00 | 40309          | 50.00 |                     |
| Sex         |                 |        |                |       |                |       | <0.001              |                    |        |                |       |                |       | 0.927               |
| Male        | 260481          | 64.18  | 238437         | 65.25 | 22044          | 54.54 |                     | 44064              | 54.66  | 22039          | 54.68 | 22025          | 54.64 |                     |
| Female      | 145357          | 35.82  | 126980         | 34.75 | 18377          | 45.46 |                     | 36554              | 45.34  | 18270          | 45.32 | 18284          | 45.36 |                     |
| Age         |                 |        |                |       |                |       | <0.001              |                    |        |                |       |                |       | 1.000               |
| < 55 years  | 73713           | 18.16  | 65626          | 17.96 | 8087           | 20.01 |                     | 16033              | 19.89  | 8011           | 19.87 | 8022           | 19.90 |                     |
| 55-64 years | 77882           | 19.19  | 69102          | 18.91 | 8780           | 21.72 |                     | 17529              | 21.74  | 8764           | 21.74 | 8765           | 21.74 |                     |
| 65-74 years | 92551           | 22.80  | 83964          | 22.98 | 8587           | 21.24 |                     | 17168              | 21.30  | 8589           | 21.31 | 8579           | 21.28 |                     |
| 75-84 years | 109250          | 26.92  | 99718          | 27.29 | 9532           | 23.58 |                     | 19056              | 23.64  | 9530           | 23.64 | 9526           | 23.63 |                     |
| ≥85 years   | 52442           | 12.92  | 47007          | 12.86 | 5435           | 13.45 |                     | 10832              | 13.44  | 5415           | 13.43 | 5417           | 13.44 |                     |
| CCI         |                 |        |                |       |                |       | <0.001              |                    |        |                |       |                |       | 1.000               |
| 0 point     | 103065          | 25.40  | 91574          | 25.06 | 11491          | 28.43 |                     | 22963              | 28.48  | 11479          | 28.48 | 11484          | 28.49 |                     |
| 1 point     | 107555          | 26.50  | 96607          | 26.44 | 10948          | 27.08 |                     | 21813              | 27.06  | 10905          | 27.05 | 10908          | 27.06 |                     |
| 2 points    | 73381           | 18.08  | 65763          | 18.00 | 7618           | 18.85 |                     | 15172              | 18.82  | 7583           | 18.81 | 7589           | 18.83 |                     |
| 3 points    | 54766           | 13.49  | 50007          | 13.68 | 4759           | 11.77 |                     | 9474               | 11.75  | 4734           | 11.74 | 4740           | 11.76 |                     |
| >3 points   | 67071           | 16.53  | 61466          | 16.82 | 5605           | 13.87 |                     | 11196              | 13.89  | 5608           | 13.91 | 5588           | 13.86 |                     |
| Cancer type |                 |        |                |       |                |       | <0.001              |                    |        |                |       |                |       | 1.000               |
| Lung        | 68445           | 16.87  | 61635          | 16.87 | 6810           | 16.85 |                     | 13610              | 16.88  | 6806           | 16.88 | 6804           | 16.88 |                     |
| Liver       | 67879           | 16.73  | 64262          | 17.59 | 3617           | 8.95  |                     | 7232               | 8.97   | 3616           | 8.97  | 3616           | 8.97  |                     |
| Colorectal  | 44675           | 11.01  | 39817          | 10.90 | 4858           | 12.02 |                     | 9700               | 12.03  | 4855           | 12.04 | 4845           | 12.02 |                     |
| Breast      | 16097           | 3.97   | 13545          | 3.71  | 2552           | 6.31  |                     | 5096               | 6.32   | 2549           | 6.32  | 2547           | 6.32  |                     |

|                  |       |       |       |       |      |       |       |       |      |       |      |       |
|------------------|-------|-------|-------|-------|------|-------|-------|-------|------|-------|------|-------|
| Oral             | 22515 | 5.55  | 19589 | 5.36  | 2926 | 7.24  | 5816  | 7.21  | 2911 | 7.22  | 2905 | 7.21  |
| Prostate         | 11516 | 2.84  | 10197 | 2.79  | 1319 | 3.26  | 2625  | 3.26  | 1313 | 3.26  | 1312 | 3.25  |
| Stomach          | 19537 | 4.81  | 17932 | 4.91  | 1605 | 3.97  | 3176  | 3.94  | 1584 | 3.93  | 1592 | 3.95  |
| Pancreatic       | 10405 | 2.56  | 9404  | 2.57  | 1001 | 2.48  | 1964  | 2.44  | 981  | 2.43  | 983  | 2.44  |
| Esophageal       | 12729 | 3.14  | 11708 | 3.20  | 1021 | 2.53  | 1995  | 2.47  | 996  | 2.47  | 999  | 2.48  |
| Cervical         | 5750  | 1.42  | 5048  | 1.38  | 702  | 1.74  | 1380  | 1.71  | 682  | 1.69  | 698  | 1.73  |
| Other            | 53855 | 13.27 | 48507 | 13.27 | 5348 | 13.23 | 10695 | 13.27 | 5347 | 13.27 | 5348 | 13.27 |
| Multiple cancers | 72435 | 17.85 | 63773 | 17.45 | 8662 | 21.43 | 17329 | 21.50 | 8669 | 21.51 | 8660 | 21.48 |

---

PSM, propensity score matching

CCI, Charlson Comorbidity Index

**Supplementary Table S6.** Comparison of patients with terminal cancer enrolled in palliative care 24 week before death and those not enrolled (before and after PSM)

| Variable    | Before matching |        |                |       |                |       |                     | After 1:1 matching |        |                |       |                |       |                     |
|-------------|-----------------|--------|----------------|-------|----------------|-------|---------------------|--------------------|--------|----------------|-------|----------------|-------|---------------------|
|             | N               | %      | No             |       | Received       |       | $\chi^2$<br>p-value | N                  | %      | No             |       | Received       |       | $\chi^2$<br>p-value |
|             |                 |        | n <sub>0</sub> | %     | n <sub>1</sub> | %     |                     |                    |        | n <sub>0</sub> | %     | n <sub>1</sub> | %     |                     |
| Total       | 383244          | 100.00 | 365417         | 95.35 | 17827          | 4.65  |                     | 35622              | 100.00 | 17811          | 50.00 | 17811          | 50.00 |                     |
| Sex         |                 |        |                |       |                |       | <0.001              |                    |        |                |       |                |       | 0.907               |
| Male        | 247811          | 64.66  | 238437         | 65.25 | 9374           | 52.58 |                     | 18758              | 52.66  | 9385           | 52.69 | 9373           | 52.62 |                     |
| Female      | 135433          | 35.34  | 126980         | 34.75 | 8453           | 47.42 |                     | 16864              | 47.34  | 8426           | 47.31 | 8438           | 47.38 |                     |
| Age         |                 |        |                |       |                |       | <0.001              |                    |        |                |       |                |       | 1.000               |
| < 55 years  | 68907           | 17.98  | 65626          | 17.96 | 3281           | 18.40 |                     | 6543               | 18.37  | 3268           | 18.35 | 3275           | 18.39 |                     |
| 55-64 years | 72949           | 19.03  | 69102          | 18.91 | 3847           | 21.58 |                     | 7683               | 21.57  | 3838           | 21.55 | 3845           | 21.59 |                     |
| 65-74 years | 87731           | 22.89  | 83964          | 22.98 | 3767           | 21.13 |                     | 7535               | 21.15  | 3768           | 21.16 | 3767           | 21.15 |                     |
| 75-84 years | 103983          | 27.13  | 99718          | 27.29 | 4265           | 23.92 |                     | 8532               | 23.95  | 4268           | 23.96 | 4264           | 23.94 |                     |
| ≥85 years   | 49674           | 12.96  | 47007          | 12.86 | 2667           | 14.96 |                     | 5329               | 14.96  | 2669           | 14.99 | 2660           | 14.93 |                     |
| CCI         |                 |        |                |       |                |       | <0.001              |                    |        |                |       |                |       | 1.000               |
| 0 point     | 96413           | 25.16  | 91574          | 25.06 | 4839           | 27.14 |                     | 9678               | 27.17  | 4839           | 27.17 | 4839           | 27.17 |                     |
| 1 point     | 101352          | 26.45  | 96607          | 26.44 | 4745           | 26.62 |                     | 9488               | 26.64  | 4747           | 26.65 | 4741           | 26.62 |                     |
| 2 points    | 69194           | 18.05  | 65763          | 18.00 | 3431           | 19.25 |                     | 6854               | 19.24  | 3427           | 19.24 | 3427           | 19.24 |                     |
| 3 points    | 52183           | 13.62  | 50007          | 13.68 | 2176           | 12.21 |                     | 4337               | 12.18  | 2167           | 12.17 | 2170           | 12.18 |                     |
| >3 points   | 64102           | 16.73  | 61466          | 16.82 | 2636           | 14.79 |                     | 5265               | 14.78  | 2631           | 14.77 | 2634           | 14.79 |                     |
| Cancer type |                 |        |                |       |                |       | <0.001              |                    |        |                |       |                |       | 1.000               |
| Lung        | 64691           | 16.88  | 61635          | 16.87 | 3056           | 17.14 |                     | 6109               | 17.15  | 3053           | 17.14 | 3056           | 17.16 |                     |
| Liver       | 65713           | 17.15  | 64262          | 17.59 | 1451           | 8.14  |                     | 2902               | 8.15   | 1451           | 8.15  | 1451           | 8.15  |                     |
| Colorectal  | 41978           | 10.95  | 39817          | 10.90 | 2161           | 12.12 |                     | 4326               | 12.14  | 2167           | 12.17 | 2159           | 12.12 |                     |
| Breast      | 14946           | 3.90   | 13545          | 3.71  | 1401           | 7.86  |                     | 2805               | 7.87   | 1404           | 7.88  | 1401           | 7.87  |                     |

|                  |       |       |       |       |      |       |      |       |      |       |      |       |
|------------------|-------|-------|-------|-------|------|-------|------|-------|------|-------|------|-------|
| Oral             | 20720 | 5.41  | 19589 | 5.36  | 1131 | 6.34  | 2253 | 6.32  | 1126 | 6.32  | 1127 | 6.33  |
| Prostate         | 10901 | 2.84  | 10197 | 2.79  | 704  | 3.95  | 1411 | 3.96  | 707  | 3.97  | 704  | 3.95  |
| Stomach          | 18537 | 4.84  | 17932 | 4.91  | 605  | 3.39  | 1209 | 3.39  | 604  | 3.39  | 605  | 3.40  |
| Pancreatic       | 9718  | 2.54  | 9404  | 2.57  | 314  | 1.76  | 622  | 1.75  | 308  | 1.73  | 314  | 1.76  |
| Esophageal       | 12091 | 3.15  | 11708 | 3.20  | 383  | 2.15  | 750  | 2.11  | 373  | 2.09  | 377  | 2.12  |
| Cervical         | 5374  | 1.40  | 5048  | 1.38  | 326  | 1.83  | 642  | 1.80  | 320  | 1.80  | 322  | 1.81  |
| Other            | 50876 | 13.28 | 48507 | 13.27 | 2369 | 13.29 | 4740 | 13.31 | 2371 | 13.31 | 2369 | 13.30 |
| Multiple cancers | 67699 | 17.66 | 63773 | 17.45 | 3926 | 22.02 | 7853 | 22.05 | 3927 | 22.05 | 3926 | 22.04 |

---

PSM, propensity score matching

CCI, Charlson Comorbidity Index

**Supplementary Table S7.** Differences in emergency care utilization and CPR according to year among patients with terminal cancer enrolled in palliative care at 1, 4, 8, 12, and 24 weeks before death and those not enrolled

|               |  | 1 week before death |                   |      | 4 weeks before death |                   |      | 8 weeks before death |                   |      | 12 weeks before death |                   |      | 24 weeks before death |                   |      |
|---------------|--|---------------------|-------------------|------|----------------------|-------------------|------|----------------------|-------------------|------|-----------------------|-------------------|------|-----------------------|-------------------|------|
|               |  | No                  | Received          |      | No                   | Received          |      | No                   | Received          |      | No                    | Received          |      | No                    | Received          |      |
|               |  | Use% <sup>a</sup>   | Use% <sup>b</sup> | b/a  | Use% <sup>a</sup>    | Use% <sup>b</sup> | b/a  | Use% <sup>a</sup>    | Use% <sup>b</sup> | b/a  | Use% <sup>a</sup>     | Use% <sup>b</sup> | b/a  | Use% <sup>a</sup>     | Use% <sup>b</sup> | b/a  |
| Emergency     |  |                     |                   |      |                      |                   |      |                      |                   |      |                       |                   |      |                       |                   |      |
| Year of death |  |                     |                   |      |                      |                   |      |                      |                   |      |                       |                   |      |                       |                   |      |
| 2005          |  | 20.83               | 10.69             | 0.51 | 44.72                | 26.97             | 0.60 | 59.06                | 40.43             | 0.68 | 63.31                 | 50.14             | 0.79 | 68.49                 | 65.07             | 0.95 |
| 2006          |  | 21.63               | 9.91              | 0.46 | 45.16                | 27.51             | 0.61 | 59.45                | 43.37             | 0.73 | 65.68                 | 52.07             | 0.79 | 75.38                 | 63.53             | 0.84 |
| 2007          |  | 21.82               | 11.69             | 0.54 | 45.53                | 29.93             | 0.66 | 59.30                | 44.97             | 0.76 | 66.56                 | 55.10             | 0.83 | 71.97                 | 70.23             | 0.98 |
| 2008          |  | 22.93               | 11.89             | 0.52 | 44.87                | 29.92             | 0.67 | 59.33                | 43.39             | 0.73 | 66.18                 | 51.15             | 0.77 | 75.75                 | 65.12             | 0.86 |
| 2009          |  | 22.63               | 11.67             | 0.52 | 47.25                | 30.62             | 0.65 | 59.75                | 46.04             | 0.77 | 66.19                 | 52.97             | 0.80 | 74.69                 | 65.16             | 0.87 |
| 2010          |  | 24.96               | 12.69             | 0.51 | 51.54                | 32.90             | 0.64 | 66.01                | 48.86             | 0.74 | 71.38                 | 58.48             | 0.82 | 81.88                 | 68.12             | 0.83 |
| 2011          |  | 27.59               | 12.59             | 0.46 | 53.98                | 33.27             | 0.62 | 66.98                | 49.55             | 0.74 | 71.79                 | 58.48             | 0.81 | 80.88                 | 69.22             | 0.86 |
| 2012          |  | 30.58               | 13.02             | 0.43 | 57.02                | 34.91             | 0.61 | 69.06                | 51.89             | 0.75 | 74.30                 | 62.95             | 0.85 | 82.02                 | 73.45             | 0.90 |
| 2013          |  | 31.28               | 12.97             | 0.41 | 57.77                | 35.40             | 0.61 | 69.80                | 53.16             | 0.76 | 75.37                 | 62.57             | 0.83 | 81.10                 | 72.59             | 0.90 |
| 2014          |  | 33.37               | 13.34             | 0.40 | 56.86                | 35.55             | 0.63 | 67.88                | 53.08             | 0.78 | 72.95                 | 63.26             | 0.87 | 78.97                 | 73.83             | 0.93 |
| 2015          |  | 34.33               | 14.30             | 0.42 | 59.00                | 37.16             | 0.63 | 69.36                | 54.40             | 0.78 | 73.80                 | 64.38             | 0.87 | 79.26                 | 75.20             | 0.95 |
| 2016          |  | 34.50               | 14.22             | 0.41 | 58.57                | 36.94             | 0.63 | 69.03                | 54.88             | 0.80 | 74.04                 | 64.15             | 0.87 | 80.41                 | 74.77             | 0.93 |
| 2017          |  | 34.55               | 13.80             | 0.40 | 57.57                | 36.86             | 0.64 | 67.65                | 53.37             | 0.79 | 72.08                 | 61.90             | 0.86 | 78.09                 | 73.78             | 0.94 |
| 2018          |  | 31.86               | 13.34             | 0.42 | 56.58                | 36.37             | 0.64 | 67.41                | 52.81             | 0.78 | 73.15                 | 61.26             | 0.84 | 79.56                 | 71.71             | 0.90 |
| CPR           |  |                     |                   |      |                      |                   |      |                      |                   |      |                       |                   |      |                       |                   |      |
| Year of death |  |                     |                   |      |                      |                   |      |                      |                   |      |                       |                   |      |                       |                   |      |
| 2005          |  | 13.82               | 1.95              | 0.14 | 14.31                | 2.26              | 0.16 | 14.38                | 2.89              | 0.20 | 15.41                 | 2.94              | 0.19 | 15.41                 | 3.08              | 0.20 |
| 2006          |  | 13.30               | 1.70              | 0.13 | 13.53                | 2.37              | 0.18 | 14.31                | 3.26              | 0.23 | 13.49                 | 3.31              | 0.25 | 12.16                 | 5.17              | 0.43 |

|      |       |      |      |       |      |      |       |      |      |       |      |      |       |      |      |
|------|-------|------|------|-------|------|------|-------|------|------|-------|------|------|-------|------|------|
| 2007 | 14.51 | 1.88 | 0.13 | 14.87 | 2.35 | 0.16 | 14.73 | 3.29 | 0.22 | 13.88 | 4.00 | 0.29 | 16.18 | 5.49 | 0.34 |
| 2008 | 12.70 | 1.35 | 0.11 | 13.49 | 2.15 | 0.16 | 14.74 | 3.16 | 0.21 | 14.82 | 3.97 | 0.27 | 15.80 | 5.99 | 0.38 |
| 2009 | 11.94 | 1.25 | 0.10 | 11.95 | 1.63 | 0.14 | 10.96 | 2.08 | 0.19 | 11.52 | 2.55 | 0.22 | 9.77  | 3.76 | 0.38 |
| 2010 | 10.80 | 1.06 | 0.10 | 11.26 | 1.40 | 0.12 | 11.74 | 2.07 | 0.18 | 12.28 | 3.09 | 0.25 | 14.25 | 4.83 | 0.34 |
| 2011 | 11.30 | 1.34 | 0.12 | 11.93 | 1.94 | 0.16 | 12.19 | 2.34 | 0.19 | 12.11 | 2.73 | 0.23 | 11.09 | 2.49 | 0.22 |
| 2012 | 11.23 | 1.54 | 0.14 | 11.80 | 2.10 | 0.18 | 12.05 | 2.79 | 0.23 | 11.72 | 3.24 | 0.28 | 11.43 | 3.57 | 0.31 |
| 2013 | 11.45 | 1.77 | 0.15 | 11.70 | 2.12 | 0.18 | 12.16 | 2.59 | 0.21 | 11.66 | 2.92 | 0.25 | 10.88 | 3.93 | 0.36 |
| 2014 | 11.95 | 1.91 | 0.16 | 12.69 | 2.27 | 0.18 | 12.87 | 2.60 | 0.20 | 13.60 | 3.06 | 0.23 | 13.48 | 3.97 | 0.29 |
| 2015 | 12.66 | 2.03 | 0.16 | 13.20 | 2.27 | 0.17 | 13.49 | 2.57 | 0.19 | 13.80 | 2.71 | 0.20 | 14.90 | 3.77 | 0.25 |
| 2016 | 12.61 | 2.15 | 0.17 | 13.46 | 2.53 | 0.19 | 13.89 | 3.04 | 0.22 | 13.69 | 3.27 | 0.24 | 13.28 | 4.35 | 0.33 |
| 2017 | 12.45 | 1.95 | 0.16 | 12.87 | 2.23 | 0.17 | 12.76 | 2.44 | 0.19 | 12.60 | 2.76 | 0.22 | 12.72 | 3.16 | 0.25 |
| 2018 | 11.98 | 1.80 | 0.15 | 12.56 | 2.07 | 0.16 | 12.68 | 2.54 | 0.20 | 12.85 | 2.82 | 0.22 | 13.25 | 3.22 | 0.24 |

---

CRP, cardiopulmonary resuscitation

**Supplementary Table S8.** Differences in endotracheal intubation and ICU admission according to year among patients with terminal cancer enrolled in palliative care at 1, 4, 8, 12, and 24 weeks before death and those not enrolled

|               |      | 1 week before death |                   |      | 4 weeks before death |                   |      | 8 weeks before death |                   |      | 12 weeks before death |                   |      | 24 weeks before death |                   |      |
|---------------|------|---------------------|-------------------|------|----------------------|-------------------|------|----------------------|-------------------|------|-----------------------|-------------------|------|-----------------------|-------------------|------|
|               |      | No                  | Received          |      | No                   | Received          |      | No                   | Received          |      | No                    | Received          |      | No                    | Received          |      |
|               |      | Use% <sup>a</sup>   | Use% <sup>b</sup> | b/a  | Use% <sup>a</sup>    | Use% <sup>b</sup> | b/a  | Use% <sup>a</sup>    | Use% <sup>b</sup> | b/a  | Use% <sup>a</sup>     | Use% <sup>b</sup> | b/a  | Use% <sup>a</sup>     | Use% <sup>b</sup> | b/a  |
| ET            |      |                     |                   |      |                      |                   |      |                      |                   |      |                       |                   |      |                       |                   |      |
| Year of death |      |                     |                   |      |                      |                   |      |                      |                   |      |                       |                   |      |                       |                   |      |
|               | 2005 | 26.38               | 2.97              | 0.11 | 27.97                | 4.13              | 0.15 | 29.53                | 5.79              | 0.20 | 30.95                 | 7.00              | 0.23 | 29.11                 | 9.93              | 0.34 |
|               | 2006 | 26.13               | 2.29              | 0.09 | 28.07                | 3.82              | 0.14 | 29.36                | 6.00              | 0.20 | 31.36                 | 7.57              | 0.24 | 32.83                 | 11.85             | 0.36 |
|               | 2007 | 25.92               | 2.45              | 0.09 | 27.91                | 3.51              | 0.13 | 30.11                | 5.26              | 0.17 | 30.70                 | 6.20              | 0.20 | 37.28                 | 8.38              | 0.22 |
|               | 2008 | 23.31               | 2.00              | 0.09 | 24.41                | 3.42              | 0.14 | 26.44                | 5.25              | 0.20 | 28.18                 | 6.89              | 0.24 | 31.88                 | 10.63             | 0.33 |
|               | 2009 | 22.91               | 1.68              | 0.07 | 24.43                | 2.63              | 0.11 | 24.56                | 4.27              | 0.17 | 24.55                 | 5.85              | 0.24 | 22.81                 | 9.77              | 0.43 |
|               | 2010 | 21.06               | 1.40              | 0.07 | 22.55                | 2.25              | 0.10 | 25.23                | 3.03              | 0.12 | 26.50                 | 3.80              | 0.14 | 28.99                 | 6.28              | 0.22 |
|               | 2011 | 20.02               | 2.31              | 0.12 | 22.19                | 3.36              | 0.15 | 23.77                | 3.92              | 0.16 | 24.42                 | 4.13              | 0.17 | 27.15                 | 5.35              | 0.20 |
|               | 2012 | 19.87               | 3.17              | 0.16 | 21.73                | 4.30              | 0.20 | 23.06                | 5.72              | 0.25 | 23.73                 | 6.68              | 0.28 | 25.24                 | 7.62              | 0.30 |
|               | 2013 | 20.73               | 4.01              | 0.19 | 21.80                | 4.77              | 0.22 | 23.62                | 5.59              | 0.24 | 24.03                 | 6.31              | 0.26 | 24.71                 | 7.77              | 0.31 |
|               | 2014 | 20.28               | 4.48              | 0.22 | 22.24                | 4.85              | 0.22 | 24.34                | 5.41              | 0.22 | 25.43                 | 6.43              | 0.25 | 26.04                 | 8.40              | 0.32 |
|               | 2015 | 20.67               | 5.28              | 0.26 | 22.61                | 5.68              | 0.25 | 24.04                | 5.90              | 0.25 | 24.93                 | 6.50              | 0.26 | 26.08                 | 8.19              | 0.31 |
|               | 2016 | 20.61               | 5.55              | 0.27 | 22.55                | 5.95              | 0.26 | 23.93                | 6.19              | 0.26 | 24.24                 | 6.43              | 0.27 | 24.05                 | 7.78              | 0.32 |
|               | 2017 | 20.14               | 5.40              | 0.27 | 21.85                | 5.63              | 0.26 | 22.88                | 5.57              | 0.24 | 23.15                 | 6.37              | 0.28 | 23.77                 | 7.79              | 0.33 |
|               | 2018 | 19.25               | 5.38              | 0.28 | 20.99                | 5.83              | 0.28 | 22.35                | 6.06              | 0.27 | 23.00                 | 6.58              | 0.29 | 23.98                 | 8.42              | 0.35 |
| ICU           |      |                     |                   |      |                      |                   |      |                      |                   |      |                       |                   |      |                       |                   |      |
| Year of death |      |                     |                   |      |                      |                   |      |                      |                   |      |                       |                   |      |                       |                   |      |
|               | 2005 | 26.11               | 2.46              | 0.09 | 28.23                | 4.31              | 0.15 | 29.87                | 6.81              | 0.23 | 32.07                 | 7.84              | 0.24 | 36.64                 | 11.64             | 0.32 |
|               | 2006 | 29.75               | 2.71              | 0.09 | 30.92                | 5.49              | 0.18 | 33.36                | 8.67              | 0.26 | 34.56                 | 11.01             | 0.32 | 39.51                 | 17.02             | 0.43 |



|      |       |       |      |       |       |      |       |       |      |       |       |      |       |       |      |
|------|-------|-------|------|-------|-------|------|-------|-------|------|-------|-------|------|-------|-------|------|
| 2007 | 28.41 | 2.54  | 0.09 | 30.73 | 4.44  | 0.14 | 33.07 | 6.90  | 0.21 | 35.33 | 8.62  | 0.24 | 41.33 | 13.29 | 0.32 |
| 2008 | 26.79 | 2.72  | 0.10 | 28.44 | 4.75  | 0.17 | 30.93 | 7.34  | 0.24 | 32.88 | 10.33 | 0.31 | 37.87 | 16.08 | 0.42 |
| 2009 | 28.92 | 2.26  | 0.08 | 30.79 | 4.15  | 0.13 | 33.16 | 6.58  | 0.20 | 32.77 | 7.65  | 0.23 | 33.58 | 13.28 | 0.40 |
| 2010 | 26.60 | 1.94  | 0.07 | 29.10 | 3.62  | 0.12 | 32.08 | 5.68  | 0.18 | 35.07 | 7.60  | 0.22 | 39.86 | 9.42  | 0.24 |
| 2011 | 26.59 | 4.52  | 0.17 | 28.48 | 6.30  | 0.22 | 30.30 | 7.81  | 0.26 | 33.07 | 8.52  | 0.26 | 38.43 | 11.85 | 0.31 |
| 2012 | 27.20 | 6.88  | 0.25 | 29.37 | 9.17  | 0.31 | 31.47 | 11.25 | 0.36 | 33.44 | 12.70 | 0.38 | 37.02 | 15.60 | 0.42 |
| 2013 | 28.00 | 9.48  | 0.34 | 29.67 | 11.31 | 0.38 | 32.21 | 12.51 | 0.39 | 33.91 | 15.12 | 0.45 | 36.17 | 16.78 | 0.46 |
| 2014 | 27.14 | 10.96 | 0.40 | 28.81 | 12.68 | 0.44 | 32.18 | 14.02 | 0.44 | 33.98 | 16.02 | 0.47 | 36.78 | 18.68 | 0.51 |
| 2015 | 26.98 | 12.42 | 0.46 | 28.69 | 13.91 | 0.48 | 31.02 | 15.39 | 0.50 | 32.88 | 17.02 | 0.52 | 36.32 | 21.27 | 0.59 |
| 2016 | 26.20 | 13.53 | 0.52 | 28.62 | 14.87 | 0.52 | 31.34 | 15.32 | 0.49 | 32.35 | 16.47 | 0.51 | 35.47 | 18.92 | 0.53 |
| 2017 | 26.95 | 13.65 | 0.51 | 29.21 | 15.04 | 0.51 | 30.98 | 16.83 | 0.54 | 32.25 | 18.37 | 0.57 | 35.68 | 22.84 | 0.64 |
| 2018 | 26.03 | 14.08 | 0.54 | 28.26 | 15.40 | 0.54 | 31.18 | 17.08 | 0.55 | 32.57 | 19.08 | 0.59 | 36.23 | 23.38 | 0.65 |

---

ET, endotracheal intubation

ICU, intensive care unit
